# Supplementary material for: A highly photoactive, visible-light-driven graphene/2D mesoporous TiO2 photocatalyst
Source: Royal Society of Chemistry journal article supplement (doi:10.1039/c5gc00641d), 2015-01-01
Supplement: c5gc00641d1.pdf [file c5gc00641d1.pdf]

# Highly photoactive, visible-light-driven graphene/ 2D mesoporous TiO<sub>2</sub> photocatalyst

*Kyeong Min Cho, Kyoung Hwan Kim, Hyung Ouk Choi and Hee-Tae Jung*

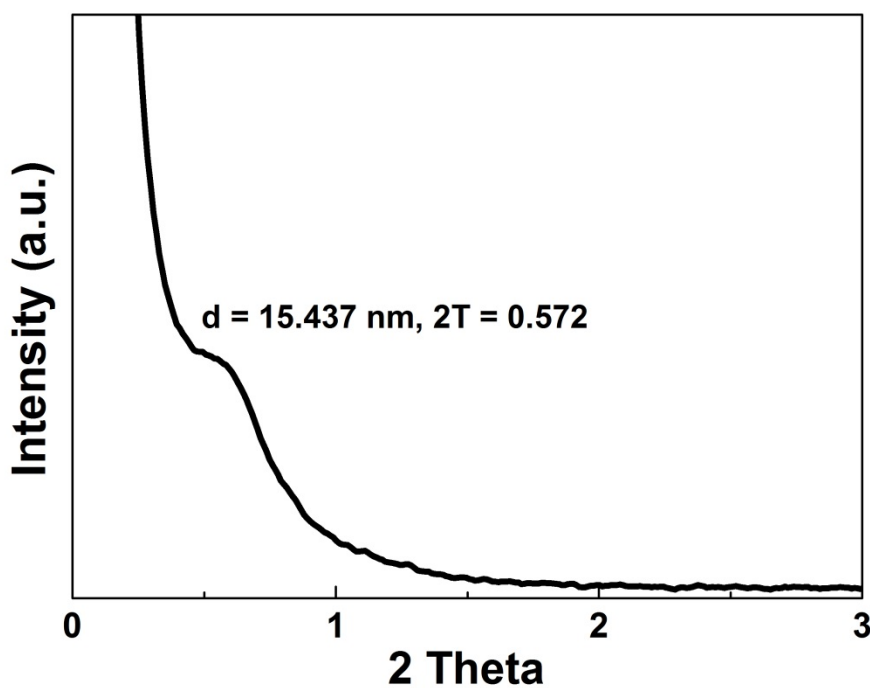

**Figure S1.** Small angle X-ray scattering (SAXS) patterns for graphene–2D mesoporous TiO<sub>2</sub>. The shoulder peak appeared at 0.572° in accordance with TEM images. The TiO<sub>2</sub> mesoporous structure has an 8 nm wide pore and a 3 nm thick wall.

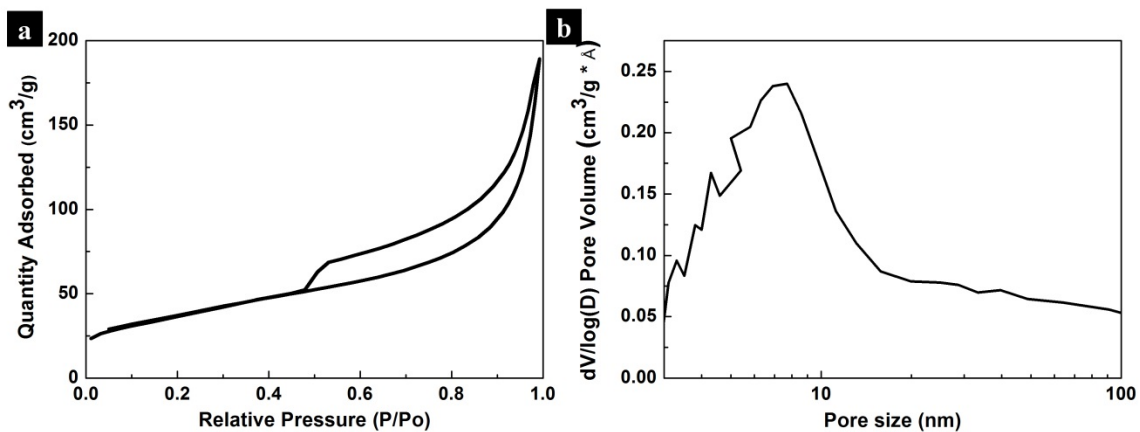

**Figure S2.** a) The N<sub>2</sub> adsorption isothermal plot at 77 K for graphene–2D mesoporous TiO<sub>2</sub>. b) Pore size distribution of graphene–2D mesoporous TiO<sub>2</sub> from BJH adsorption. The specific surface area is 130.5 m<sup>2</sup>/g and the pore size is ~8 nm.

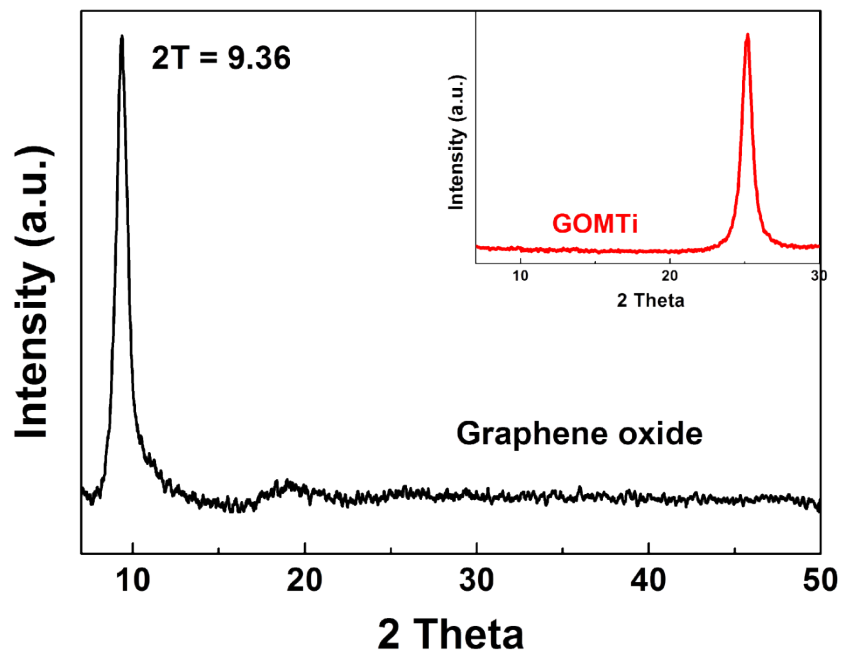

**Figure S3.** The XRD pattern of graphene oxide produced by the modified Hummer's method shows a sharp peak at  $9.36^\circ$ . The inset image is the magnified XRD pattern of GOMTi after calcination which disappears the peak of graphene oxide.

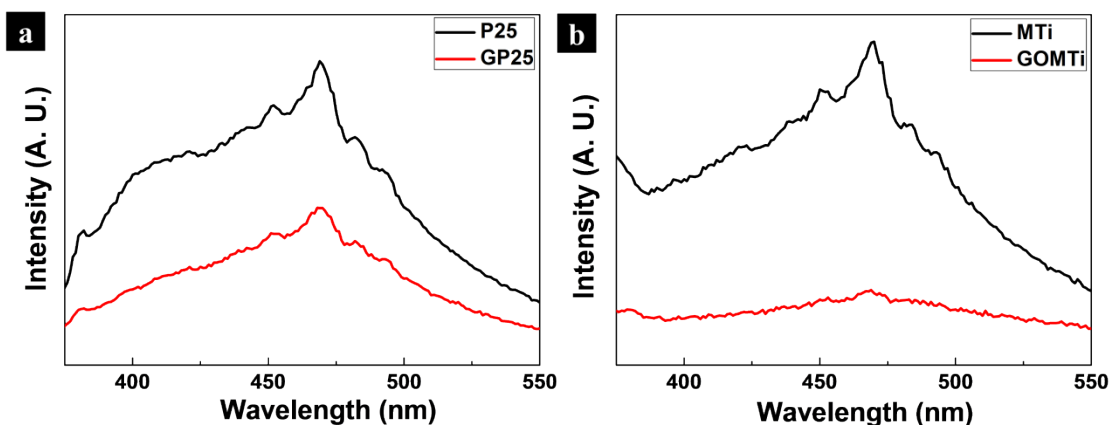

**Figure S4.** a) The photoluminescence spectra of conventional  $\text{TiO}_2$  nanoparticles (P25, black ) and graphene–P25 (red). b) The photoluminescence spectra of mesoporous  $\text{TiO}_2$ (MTi, black) and graphene–2D mesoporous  $\text{TiO}_2$  (red). The photoluminescence of graphene–2D mesoporous  $\text{TiO}_2$  was significantly lower than that of MTi. This comes from the fast charge separation of electrons with the help of reduced graphene oxide. Also, the charge separation in catalyst by incorporation of graphene significantly enhanced compared to graphene-P25 composite.

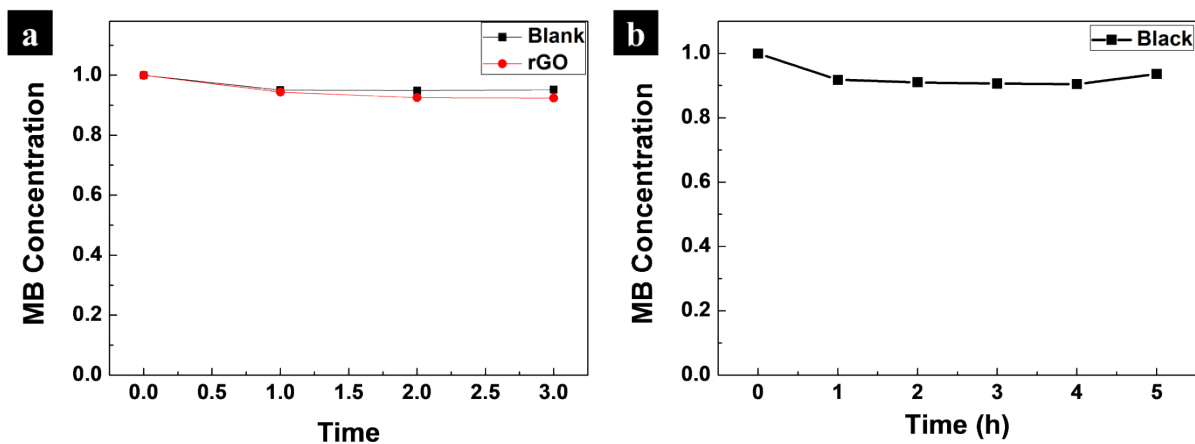

**Figure S5.** a) Photodegradation of methylene blue (MB) under visible light in reduced graphene oxide (rGO, red) and without catalyst (black) and b) photodegradation of methylene blue (MB) without visible-light.

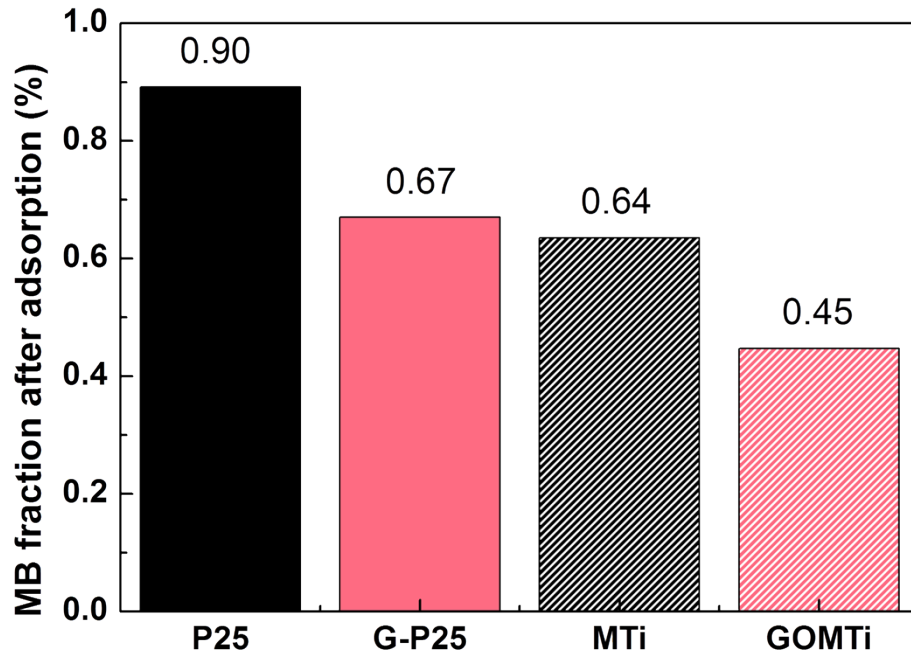

**Figure S6.** The remained methylene blue (MB) after full adsorption on P25, graphene/P25, mesoporous TiO<sub>2</sub> and graphene/2D mesoporous TiO<sub>2</sub>. The GOMTi adsorb the many methylene blue, corresponding the large reactive surface area.
